# Supplementary material
Source: publisher site journal article supplement (https://www.dovepress.com/article/225762)
Supplement: Supplementary file 1 [file get_supplementary_file.php]

**Supplementary material**

**Figure S1** Sensitivities and specificities for simple risk score systems.

**Figure S2** AUCs for simple risk score systems.

**Figure S3** Sensitivities and specificities for ensemble methods with existing scores and new scores.

**Figure S4** AUCs for ensemble methods with existing scores and new scores.

**Figure S5** Sensitivities and specificities for ensemble methods with existing scores only.

**Figure S6** AUCs for ensemble methods with existing scores only.

| **Table S1** The first new non-invasive score system for estimating the risk of type 2 diabetes | | | | | |
| --- | --- | --- | --- | --- | --- |
| **Variables** | **-Coefficient ()** | **Risk Factors** | **Reference Values ()** | **(*-*)** | **Points** |
| Intercept | -8.1992 (0.4599) |  |  |  |  |
| Age | 0.0285 (0.0044) | <50 | 45 () | 0 | 0 |
| 50–60 | 54.5 | 0.2708 | 1 |
| 60–70 | 64.5 | 0.5558 | 2 |
| >=70 | 73 | 0.7980 | 3 |
| WC | 0.0549 (0.0046) | <75 | 71 () | 0 | 0 |
| 75–80 | 77.5 | 0.3569 | 1 |
| 80–85 | 82.5 | 0.6314 | 2 |
| 85–90 | 87.5 | 0.9059 | 3 |
| 90–95 | 92.5 | 1.1804 | 4 |
| >=95 | 98 | 1.4823 | 5 |
| Hypertension | 0.4498 (0.1222) | No | 0 () | 0 | 0 |
| Yes | 1 | 0.4498 | 2 |
| Family history of diabetes | 0.8915 (0.1158) | No | 0 () | 0 | 0 |
| Yes | 1 | 0.8915 | 3 |
| High cholesterol | 0.6698 (0.1410) | No | 0 () | 0 | 0 |
| Yes | 1 | 0.6698 | 2 |
| MI | 0.7379 (0.2919) | No | 0 () | 0 | 0 |
| Yes | 1 | 0.7379 | 3 |

| **Table S2** The second new non-invasive score system for estimating the risk of type 2 diabetes | | | | | |
| --- | --- | --- | --- | --- | --- |
| **Variables** | **-Coefficient ()** | **Risk Factors** | **Reference Values ()** | **(*-*)** | **Points** |
| Intercept | -8.1703 (0.4556) |  |  |  |  |
| Age | 0.0315 (0.0043) | <50 | 45 () | 0 | 0 |
| 50–60 | 54.5 | 0.2993 | 1 |
| 60–70 | 64.5 | 0.6143 | 2 |
| >=70 | 73 | 0.882 | 3 |
| WC | 0.0571 (0.0046) | <75 | 71 () | 0 | 0 |
| 75–80 | 77.5 | 0.3712 | 1 |
| 80–85 | 82.5 | 0.6567 | 2 |
| 85–90 | 87.5 | 0.9422 | 3 |
| 90–95 | 92.5 | 1.2277 | 4 |
| >=95 | 98 | 1.5417 | 5 |
| Family history of diabetes | 0.8988 (0.1153) | No | 0 () | 0 | 0 |
| Yes | 1 | 0.8988 | 3 |
| High cholesterol | 0.6805 (0.1400) | No | 0 () | 0 | 0 |
| Yes | 1 | 0.6805 | 2 |

| **Table S3** Performance of the two new risk score systems and other published scores in eastern Asian and Western countries for classification of diabetes in a testing population (n=1,644). Indicated in parentheses for AUC, sensitivity, specificity, positive and negative likelihood ratios, and positive and negative predictive values are the corresponding 95% confidence intervals. | | | | | | | | | | |
| --- | --- | --- | --- | --- | --- | --- | --- | --- | --- | --- |
|  | AUC | Cutoff | Sensitivity | Specificity | +LR | -LR | +PV | -PV | Youden index | P-value |
| FINDRISC14 | 0.659 (0.629,0.689) | >3 | 0.736 (0.689,0.778) | 0.484 (0.407,0.456) | 1.426 (1.317,1.545) | 0.546 (0.459,0.650) | 0.312 (0.283,0.343) | 0.852 (0.824,0.877) | 0.220 | 0 |
| AYSDRISK15 | 0.687 (0.658,0.716) | >12 | 0.627 (0.578,0.675) | 0.631 (0.604,0.658) | 1.700 (1.531,1.888) | 0.591 (0.516,0.676) | 0.351 (0.316,0.388) | 0.842 (0.817,0.865) | 0.258 | 0 |
| French risk score9 | 0.663 (0.634,0.693) | >2 | 0.489 (0.438,0.539) | 0.760 (0.736,0.784) | 2.038 (1.770,2.347) | 0.673 (0.608,0.744) | 0.394 (0.350,0.438) | 0.824 (0.800,0.845) | 0.249 | 0 |
| Cambridge risk score38 | 0.610 (0.579,0.641) | >-6.048 | 0.491 (0.441,0.542) | 0.692 (0.666,0.718) | 1.595 (1.400,1.817) | 0.735 (0.663,0.815) | 0.337 (0.298,0.377) | 0.810 (0.785,0.833) | 0.183 | 0 |
| Rural Chinese risk score13 | 0.693 (0.664,0.722) | >9 | 0.741 (0.694,0.783) | 0.539 (0.511,0.567) | 1.606 (1.477,1.746) | 0.481 (0.405,0.573) | 0.338 (0.307,0.371) | 0.867 (0.841,0.890) | 0.279 | 0 |
| Thai risk score8 | 0.677 (0.647,0.706) | >8 | 0.542 (0.491,0.591) | 0.727 (0.702,0.752) | 1.986 (1.747,2.258) | 0.630 (0.563,0.705) | 0.387 (0.347,0.429) | 0.833 (0.809,0.855) | 0.269 | 0 |
| Chinese risk score10 | 0.714 (0.685,0.742) | >32 | 0.622 (0.572,0.670) | 0.694 (0.667,0.719) | 2.031 (1.813,2.275) | 0.545 (0.478,0.621) | 0.393 (0.354,0.432) | 0.852 (0.829,0.873) | 0.316 | 0 |
| Qingdao risk score12 | 0.684 (0.653,0.713) | >18 | 0.529 (0.479,0.579) | 0.707 (0.681,0.732) | 1.807 (1.592,2.051) | 0.553 (0.487,0.628) | 0.365 (0.326,0.406) | 0.825 (0.801,0.847) | 0.236 | 0 |
| Japanese risk score37 | 0.643 (0.613,0.673) | >8 | 0.637 (0.588,0.685) | 0.605 (0.578,0.633) | 1.615 (1.460,1.787) | 0.599 (0.522,0.688) | 0.340 (0.306,0.375) | 0.840 (0.814,0.863) | 0.243 | 0 |
| New risk score 1 | 0.708 (0.679,0.736) | >8 | 0.637 (0.588,0.685) | 0.671 (0.644,0.697) | 1.938 (1.739,2.161) | 0.540 (0.472,0.619) | 0.382 (0.344,0.420) | 0.853 (0.829,0.875) | 0.308 | 0 |
| New risk score 2 | 0.702 (0.673,0.730) | >4 | 0.660 (0.611,0.706) | 0.645 (0.617,0.671) | 1.858 (1.676,2.059) | 0.527 (0.457,0.609) | 0.372 (0.336,0.408) | 0.856 (0.832,0.878) | 0.305 | 0 |

| **Table S4** FINRISC study type 2 diabetes risk assessment score system | | | | |
| --- | --- | --- | --- | --- |
| FINDRISC score14 | Age | 45–54 | | 2 |
| 55–64 | | 3 |
| BMI | >25–30 | | 1 |
| >30 | | 3 |
| Waist Circumference | M 94–102(<) | W 80–88(<) | 3 |
| M >=102 | W >=88 | 4 |
| Antihypertension Medication | Yes | | 2 |
| High Blood Glucose | Yes | | 5 |

| **Table S5** Australian type 2 diabetes risk assessment score system | | | | |
| --- | --- | --- | --- | --- |
| AYSDRISK score15 | Age | 35–44 | | 2 |
| 45–54 | | 4 |
| 55–64 | | 6 |
| >=65 | | 8 |
| Gender | Male | | 3 |
| Ethnicity | Asia | | 2 |
| Family History | Yes | | 3 |
| Smoking | Yes | | 2 |
| Waist Circumference | Asian | |  |
| M 90–100 | W 80–90 | 4 |
| M >100 | W >90 | 7 |
| Other | |  |
| M 102–110 | W 88–100 | 4 |
| M >110 | W >100 | 7 |
| Physical Inactivity | Yes | | 2 |
| Antihypertension Medication | Yes | | 2 |
| High Blood Glucose | Yes | | 6 |

| **Table S6** French type 2 diabetes risk assessment score system | | | | |
| --- | --- | --- | --- | --- |
| French DESIR score9 | Family History (F)/Smoking (M) | Yes | | 1 |
| Hypertension | Yes | | 1 |
| Waist Circumference | M 80–89 | W 70–79 | 1 |
| M 90–99 | W 80–89 | 2 |
| M >=100 | W >=90 | 3 |

| **Table S7** Cambridgeshire type 2 diabetes risk assessment score system | | | |
| --- | --- | --- | --- |
| Cambridge risk score38 | Intercept |  | -6.322 |
| Female | Yes | -0.879 |
| Antihypertension Medication | Yes | 1.222 |
| Steroids | Yes | 2.191 |
| Family History | Parent or Sibling | 0.728 |
| Parent and Sibling | 0.753 |
| Smoking | Ex-smoker | -0.218 |
| Current smoker | 0.855 |
| BMI | 25–27.49 | 0.699 |
| 27.5–29.99 | 1.97 |
| >=30 | 2.518 |

| **Table S8** Rural Chinese type 2 diabetes risk assessment score system | | | | |
| --- | --- | --- | --- | --- |
| Rural Chinese score13 | Age | 40–49 | | 2 |
| 50–59 | | 4 |
| 60–69 | | 6 |
| >=70 | | 8 |
| BMI | 24–27.9 | | 1 |
| >=28 | | 3 |
| Family History | Yes | | 9 |
| Waist Circumference | M 80–84.9 | W 75–79.9 | 2 |
| M 85–89.9 | W 80–84.9 | 3 |
| M 90–94.9 | W 85–89.9 | 5 |
| M >=95 | W >=90 | 7 |
| Physical Inactivity | Yes | | 2 |
| Antihypertension Medication | Yes | | 2 |
| High Blood Glucose | Yes | | 6 |

| **Table S9** Thai population type 2 diabetes risk assessment score system | | | | |
| --- | --- | --- | --- | --- |
| Thai risk score8 | Age | 45–49 | | 1 |
| >=50 | | 2 |
| Sex | Male | | 2 |
| BMI | 23–27.5 | | 3 |
| >=27.5 | | 5 |
| Family History (sib. or parent) | Yes | | 4 |
| Waist Circumference | M >=90 | W >=80 | 2 |
| Hypertension | Yes | | 2 |

| **Table S10** Japanese type 2 diabetes risk assessment score system | | | |
| --- | --- | --- | --- |
| Japanese risk score37 | Sex | Male | 4 |
| Age | >=55 | 2 |
| Family History (sib. or parent) | Yes | 7 |
| BMI | 23–24 | 2 |
| >=25 | 7 |
| Smoke | Yes | 2 |

| **Table S11** Qingdao type 2 diabetes risk assessment score system | | | | |
| --- | --- | --- | --- | --- |
| Qingdao risk score12 | Age | <=35 | | 1 |
| 36–45 | | 3 |
| 46–55 | | 6 |
| 56–65 | | 9 |
| >=66 | | 12 |
| Family History (sib. or parent) | No | | 1 |
| Yes | | 8 |
| Waist Circumference (Chinese chi) | M <=2.3 | W <=2 | 1/1 |
| M 2.4–2.6 | W 2.1–2.3 | 4/3 |
| N 2.7–2.9 | W 2.4–2.6 | 8/6 |
| M >=3.0 | W >=2.7 | 12/9 |

| **Table S12** Chinese national type 2 diabetes risk assessment score system | | | | |
| --- | --- | --- | --- | --- |
| Chinese diabetes risk score10 | Age | 25–34 | | 4 |
| 35–39 | | 8 |
| 40–44 | | 11 |
| 45–49 | | 12 |
| 50–54 | | 13 |
| 55–59 | | 14 |
| 60–64 | | 15 |
| >=65 | | 18 |
| BMI | 22–23.9 | | 1 |
| 24–29.9 | | 3 |
| >=30 | | 5 |
| Family History | Yes | | 6 |
| Waist Circumference | M 75–79.9 | W 70–74.9 | 3 |
| M 80–84.9 | W 75–79.9 | 4 |
| M 85–89.9 | W 80–84.9 | 7 |
| M 90–94.9 | W 85–89.9 | 8 |
| M >=95 | W >=90 | 10 |
| Systolic blood pressure | 110–119 | | 1 |
| 120–129 | | 3 |
| 130–139 | | 6 |
| 140–149 | | 7 |
| 150–159 | | 8 |
| >=160 | | 10 |
| Sex | Male | | 2 |

| **Table S13** List of candidate variables of the 5,481 participants included in the risk score systems. | | |
| --- | --- | --- |
|  | Variable | Category (%) |
| Demographics | Gender | Men (33.1) |
| Women (66.9) |
| Age | <50 (23.8) |
| 50-60 (36.8) |
| 60-70 (27.5) |
| >=70 (11.9) |
| Current Smoker | Yes (16.2) |
| No (83.8) |
| Family history of diabetes | Yes (12.4) |
| No () |
| Body mass index | <22 (17.5) |
| 22-24 (22.0) |
| 24-29 (48.8) |
| >=29 (11.7) |
| Waist circumference | <75 (15.1) |
| 75-80 (16.4) |
| 80-85 (20.2) |
| 85-90 (20.1) |
| 90-95 (13.8) |
| >=95 (14.4) |
| Medical history | Tumor | Yes (3.9) |
| No (96.1) |
| MI | Yes (1.3) |
| No (98.7) |
| Stroke | Yes (2.5) |
| No (97.5) |
| Coronary heart disease | Yes (11.8) |
| No (88.2) |
| Lower extremity arterial diseases | Yes (0.5) |
| No (99.5) |
| Retinopathy | Yes (1.1) |
| No (98.9) |
| Virus hepatitis | Yes (1.1) |
| No (98.9) |
| Liver cirrhosis | Yes (0.1) |
| No (99.9) |
| Autoimmune hepatitis | Yes (0.1) |
| No (99.9) |
| Cholecystitis | Yes (6.3) |
| No (93.7) |
| Gallstone | Yes (3.8) |
| No (93.2) |
| Gallbladder polyp | Yes (1.2) |
| No (98.8) |
| Acute pancreatitis | Yes (0.3) |
| No (99.7) |
| Chronic pancreatitis | Yes (0.3) |
| No (99.7) |
| Duodenal ulcer | Yes (3.4) |
| No (96.6) |
| Kidney stone | Yes (3.0) |
| No (97.0) |
| Renal cyst | Yes (0.8) |
| No (99.2) |
| Chronic nephritis | Yes (1.2) |
| No (98.8) |
| Chronic gastroenteritis | Yes (6.6) |
| No (93.4) |
| Chronic bronchitis | Yes (3.5) |
| No (96.5) |
| Renal syndrome | Yes (0.1) |
| No (99.9) |
| Pneumonectasis | Yes (0.5) |
| No (99.5) |
| Hyperlipidemia | Yes (7.2) |
| No (92.8) |
| Fatty liver | Yes (8.5) |
| No (91.5) |
| Hypertension | Yes (13.1) |
| No (86.9) |
